# Supplementary material for: Return to Work in the Gastric Cancer Survivors
Source: Research Square preprint supplement (doi:10.21203/rs.3.rs-144594/v1), 2021-01-16
Supplement: Supplementary file 1 [file 594e641101c66d58f05aace9.docx]

| Comorbidity | ICD-9 code |
| --- | --- |
| Malignant neoplasm of cardia | ICD-9-CM 151.0 |
| Malignant neoplasm of pylorus | ICD-9-CM 151.1 |
| Malignant neoplasm of pyloric antrum | ICD-9-CM 151.2 |
| Malignant neoplasm of fundus of stomach | ICD-9-CM 151.3 |
| Malignant neoplasm of body of stomach | ICD-9-CM 151.4 |
| Malignant neoplasm of lesser curvature of stomach, unspecified | ICD-9-CM 151.5 |
| Malignant neoplasm of greater curvature of stomach, unspecified | ICD-9-CM 151.6 |
| Malignant neoplasm of other specified sites of stomach | ICD-9-CM 151.8 |
| Malignant neoplasm of stomach, unspecified sites | ICD-9-CM 151.9 |

Supplementary Table 1. Gastric cancer and corresponding ICD-9 code

Supplementary Table 2. Clinical comorbidity and corresponding ICD-9 code

| Comorbidity | ICD-9 code |
| --- | --- |
| Disorders of lipid metabolism | ICD-9 272 |
| Alcohol abuse | ICD-9 265.2, 291.1-291.3, 291.5-291.9, 303.0, 303.9, 305.0, 357.5, 425.5, 535.3, 571.0-571.3, 980.x, V11.3 |
| Cerebrovascular diseases | ICD-9 362.34, 430.x-438.x |
| Chronic pulmonary diseases | ICD-9 416.8, 416.9, 490.x-505.x, 506.4, 508.1, 508.8 |
| Peptic ulcer diseases | ICD-9 531.x-534.x |
| Renal diseases | ICD-9 403.01, 403.11, 403.91, 404.02, 404.03, 404.12, 404.13, 404.92, 404.93, 582.x, 583.0-583.7, 585.x, 586.x, V42.0, V45.1, V56.x |
| Liver diseases | ICD-9 070.22, 070.23, 070.32, 070.33, 070.44, 070.54, 070.6, 070.9, 570.x, 571.x, 573.3, 573.4, 573.8, 573.9, V42.7 |
| Psychoses | ICD-9 293.8, 295.x, 296.04, 296.14, 296.44, 296.54, 297.x, 298.x |
| Depression | ICD-9 296.2, 296.3, 296.5, 300.4, 309.x, 311.x |
